# Supplementary material
Source: PubMed Central journal article supplement (PMC3646060)
Supplement: NIHMS305680-supplement-1_si_001.pdf [file NIHMS305680-supplement-1_si_001.pdf]

## SUPPORTING INFORMATION

# Pb<sup>2+</sup> as modulator of protein-membrane interactions

*Krystal A. Morales,<sup>†</sup> Mauricio Lasagna,<sup>†</sup> Alexey V. Gribenko,<sup>§,‡</sup> Youngdae Yoon,<sup>#</sup> Gregory D. Reinhart,<sup>†</sup>*

*James C. Lee,<sup>§</sup> Wonhwa Cho,<sup>#</sup> Pingwei Li,<sup>†</sup> and Tatyana I. Igumenova<sup>†,\*</sup>*

<sup>†</sup>Department of Biochemistry and Biophysics, Texas A&M University, College Station, TX 77843;

<sup>#</sup>Department of Chemistry, University of Illinois at Chicago, Chicago, IL 60607;

<sup>§</sup>Department of Biochemistry and Molecular Biology, The University of Texas Medical Branch at  
Galveston, Galveston, TX 77555.

<sup>‡</sup>Current address: Pfizer, Pearl River, NY 10965.

\*Corresponding author: Tatyana I. Igumenova, phone: (979) 845 6312, fax: (979) 845 4946, e-mail:  
tigumenova@tamu.edu.

## 1. Over-expression and purification of C2 $\alpha$

C2 $\alpha$  over-expression was carried out in *E. coli* BL21(DE3) cells. Cell cultures were grown to an OD<sub>600</sub> of 0.6 and induced with 0.5 mM IPTG for 4 hours at 37 °C for all natural abundance preparations. Isotopically enriched protein was over-expressed according to the method of Marley et al.,<sup>1</sup> with overnight induction at 15 °C. The M9 minimal media was supplemented with 1 g/L of <sup>15</sup>NH<sub>4</sub>Cl and 3 g/L of [<sup>13</sup>C-6]-D-glucose (or natural abundance D-glucose) as sole nitrogen and carbon sources, respectively. Fractionally deuterated protein sample was produced using M9 minimal media containing 75% <sup>2</sup>H<sub>2</sub>O, 3 g/L of [<sup>13</sup>C-6]-D-glucose, and 1 g/L of <sup>15</sup>NH<sub>4</sub>Cl.

The histidine-tagged SUMO-C2 $\alpha$  fusion protein was purified using a HisTrap™ HP Ni affinity column (GE Healthcare Life Sciences). The fractions containing fusion protein were desalted on a HiPrep 26/10 column (GE Healthcare Life Sciences). Isolated C2 $\alpha$  domain was obtained by cleaving the fusion protein for 30 minutes with histidine-tagged SUMO protease at room temperature, followed by another Ni affinity purification step to remove the histidine-tagged SUMO and SUMO protease. The final purification step was cation-exchange chromatography on a Source 15S column (GE Healthcare Life Sciences), carried out in 10 mM 2-(N-morpholino)ethanesulfonic acid (MES) buffer at pH = 6.0, 0.1 mM EDTA, and a linear concentration gradient of KCl. The purity of C2 $\alpha$  was evaluated using SDS-PAGE. The molecular weight was verified by MALDI-TOF mass spectrometry.

## 2. Data collection and structure determination of apo- and Pb<sup>2+</sup>-bound C2 $\alpha$

All diffraction data were collected using a Rigaku RAXIS IV<sup>++</sup> image plate detector mounted on a Rigaku Micromax-007HF generator. The data were processed with the HKL2000 package.<sup>2</sup>

The apo-C2 $\alpha$  domain crystallized in space group P3<sub>2</sub>21 with the following cell parameters: a=b=58.00 Å, c=90.46 Å, and  $\gamma$ =120°. The crystallographic asymmetric unit (ASU) contains one C2 $\alpha$  molecule. The Pb<sup>2+</sup>-bound C2 $\alpha$  also crystallized in space group P3<sub>2</sub>21 with slightly different unit cell dimensions: a=b=58.29 Å, c=87.98 Å. The structure of the Pb<sup>2+</sup>-bound C2 $\alpha$  was determined by

molecular replacement using MOLREP in the CCP4 suite. The  $\text{Ca}^{2+}$ -bound C2 $\alpha$  structure after the deletion of the  $\text{Ca}^{2+}$  ions (PDB code: 1DSY)<sup>3</sup> was used as a search model. The electron density map for the  $\text{Pb}^{2+}$  ions was apparent in the  $2F_o-F_c$  difference map (**Figure S1A**). Only two strong peaks corresponding to the lead ions were observed in the anomalous difference map (**Figure S1B**), indicating that there was no nonspecific binding. The structural models were rebuilt using O and refined by several rounds of positional and B-factor refinement using CNS. Structure of the apo-C2 $\alpha$  was refined using the high- resolution lead-bound C2 domain as a starting model. The structure was rebuilt with O and refined with CNS. The coordinates were submitted to the Protein Data Bank (<http://www.pdb.org/>) and were assigned the ID codes of 3RDJ and 3RDL for the apo- and  $\text{Pb}^{2+}$ -bound structures, respectively.

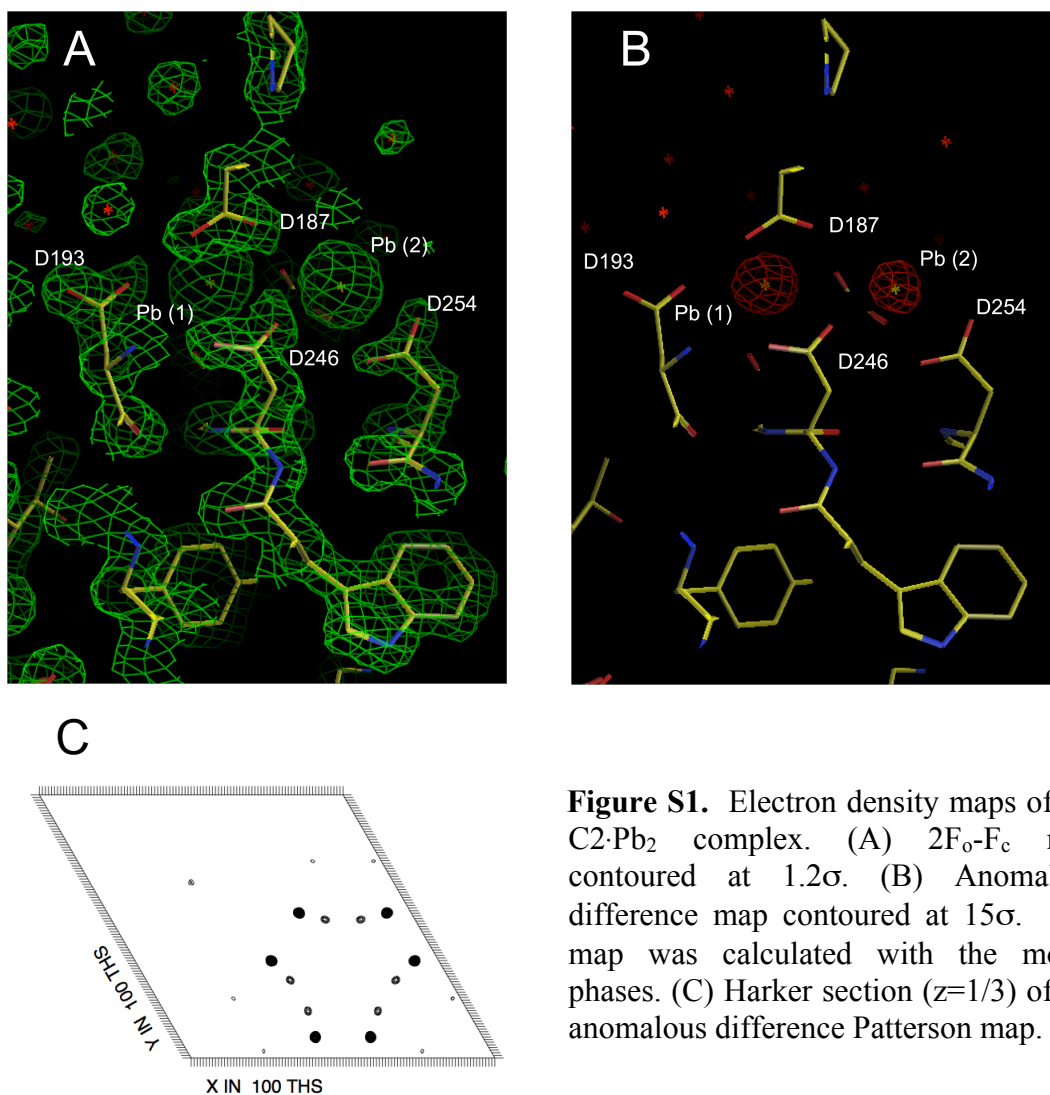

**Figure S1.** Electron density maps of the C2·Pb<sub>2</sub> complex. (A)  $2F_o-F_c$  map contoured at  $1.2\sigma$ . (B) Anomalous difference map contoured at  $15\sigma$ . The map was calculated with the model phases. (C) Harker section ( $z=1/3$ ) of the anomalous difference Patterson map.

**Table S1.** Crystallographic data collection and refinement statistics.

| <b>Diffraction Data</b>               | <b>Apo C2<math>\alpha</math></b>   | <b>Pb<sup>2+</sup>-bound C2<math>\alpha</math></b> |
|---------------------------------------|------------------------------------|----------------------------------------------------|
| Wavelength (Å)                        | 1.542                              | 1.542                                              |
| Space group                           | P3 <sub>2</sub> 21                 | P3 <sub>2</sub> 21                                 |
| Unit cell                             | a=b=58.00 Å, c=90.46 Å             | a=b=58.29 Å, c=87.98 Å                             |
| Resolution (Å)                        | 50.0-1.90 (1.97-1.90) <sup>a</sup> | 50.0-1.50 (1.55-1.50) <sup>a</sup>                 |
| Unique reflections                    | 14383                              | 27889                                              |
| Redundancy                            | 6.3 (6.2)                          | 6.5 (4.0)                                          |
| Completeness                          | 99.8% (99.7%)                      | 98.3 (93.2)                                        |
| $\langle I/\sigma I \rangle$          | 47.5 (5.2)                         | 60.4 (5.6)                                         |
| R <sub>sym</sub> (%)                  | 5.3 (45.4)                         | 7.4 (32.3)                                         |
| <b>Refinement</b>                     |                                    |                                                    |
| Resolution (Å)                        | 50.0-1.90                          | 50.0-1.50                                          |
| Reflections (F>0)                     |                                    |                                                    |
| (total/test set)                      | 14022/1438                         | 51491/5041                                         |
| Protein atoms                         | 1129                               | 1129                                               |
| Pb (II) ions                          | 0                                  | 2                                                  |
| Sulfate ions                          | 0                                  | 4                                                  |
| Solvent atoms                         | 107                                | 205                                                |
| R <sub>cryst</sub> /R <sub>free</sub> | 22.5%/24.5%                        | 20.4%/21.9%                                        |
| RMSD, bond length                     | 0.010 Å                            | 0.011 Å                                            |
| RMSD, bond angle                      | 1.67°                              | 1.67°                                              |

<sup>a</sup>Values in the parentheses are for the highest-resolution shell; 10% of reflections are used in the test set for the R<sub>free</sub> calculation.

### 3. NMR-detected binding of $\text{Ca}^{2+}$ to apo C2 $\alpha$

NMR-detected  $\text{Ca}^{2+}$  binding experiments were carried out as described in the Experimental Section. It is evident from the NMR spectra that the metal-binding sites of C2 $\alpha$  have comparable affinities to  $\text{Ca}^{2+}$  ions. The presence of three species, C2 $\alpha$ ·Ca(1), C2 $\alpha$ ·Ca(2) and C2 $\alpha$ ·(Ca) $_2$ , each having its own chemical shift, precludes the use of an analytical function to describe the binding process. In addition, all  $\text{Ca}^{2+}$  binding curves show a lag period, indicating some degree of positive cooperativity. To estimate the binding affinity, we fit the curves individually with the Hill equation. The range of apparent  $K_d$  values is 250-530  $\mu\text{M}$ , with the median of 350  $\mu\text{M}$ . This range reflects the differential response of C2 $\alpha$  residues to  $\text{Ca}^{2+}$  binding and the approximation, under which the concentration of free ligand is considered to be approximately equal to the total concentration of the ligand. Correction for the free ligand concentration, implemented as described for the C2 domain of rabphilin-3A,<sup>4</sup> gives a  $K_d$  range of 150-480  $\mu\text{M}$  with the median of 270  $\mu\text{M}$ . Several representative  $\text{Ca}^{2+}$  binding curves are shown below for the residues that belong to  $\text{Ca}^{2+}$ -binding loop regions CBL1, CBL2, and CBL3.

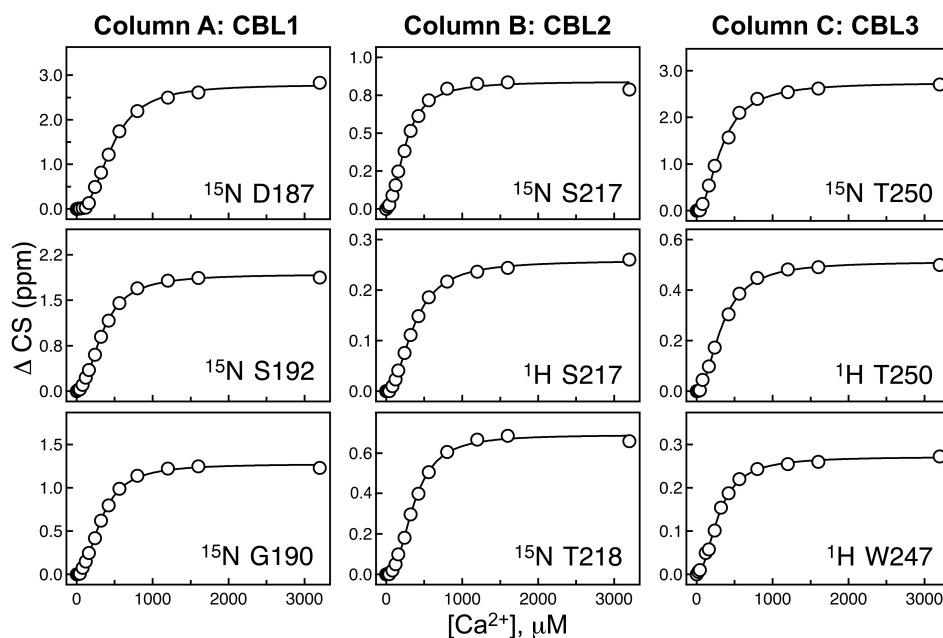

**Figure S2.** Representative  $\text{Ca}^{2+}$  binding curves for residues that belong to  $\text{Ca}^{2+}$ -binding loops (CBLs) 1, 2, and 3. The absolute change in chemical shift is plotted as a function of the total  $\text{Ca}^{2+}$  concentration. The fits were generated using the Hill equation. C2 $\alpha$  concentration is 160  $\mu\text{M}$ .

#### 4. Estimation of the Ca<sup>2+</sup> binding affinity to the preformed C2α·Pb complex

We interpreted the results of Ca<sup>2+</sup> binding to the *preformed* C2α·Pb complex using a set of the following equilibria:

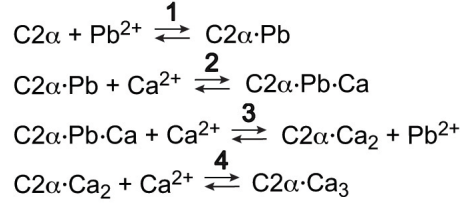

The objective is to estimate the dissociation constant  $K_d$  of the C2α·Pb·Ca complex in Step 2. This constant can be determined from the NMR data by fitting the dependence of the chemical shift on the total concentration of Ca<sup>2+</sup> using Eq. (1) from the Experimental Section. However, Ca<sup>2+</sup> is also consumed in Steps 3 and 4 to form the Ca<sup>2+</sup>-bound protein species. Hence, we wanted to estimate the extent to which the total Ca<sup>2+</sup> concentration has to be modified to reflect the depletion of the Ca<sup>2+</sup> pool. We selected three Ca<sup>2+</sup> concentration points for the analysis: 3.2, 8.0, and 20 mM. The corresponding populations of the Ca-bound protein species ( $P_{Ca}$ ) are 0.365, 0.457, and 0.615. The calcium mass balance equations are:

$$\frac{[\text{Ca}^{2+}]_T}{P_0} = \frac{[\text{Ca}^{2+}]_F}{P_0} + P_{\text{PbCa}} + 2P_{\text{Ca}_2} + 3P_{\text{Ca}_3} = \frac{[\text{Ca}^{2+}]_F}{P_0} + P_{\text{PbCa}} + 2P_{\text{Ca}} + P_{\text{Ca}_3} \quad (\text{Eq. S1})$$

$$\text{where } P_{\text{Ca}} = P_{\text{Ca}_2} + P_{\text{Ca}_3}. \quad (\text{Eq. S2})$$

$[\text{Ca}^{2+}]_T$  is the total concentration of Ca<sup>2+</sup>;  $[\text{Ca}^{2+}]_F$  is the concentration of free Ca<sup>2+</sup>;  $P_0=160 \mu\text{M}$  is the total concentration of C2α;  $P_{\text{PbCa}}$ ,  $P_{\text{Ca}_2}$ , and  $P_{\text{Ca}_3}$  are the fractional populations of the C2α·Pb·Ca, C2α·Ca<sub>2</sub>, and C2α·Ca<sub>3</sub> species, respectively.  $P_{\text{Ca}}$  values were determined from the Ca<sup>2+</sup> titration of the *preformed* C2α·Pb complex. For the purpose of estimating the  $K_d$ , we assume that C2α·Ca<sub>2</sub> species fully convert into C2α·Ca<sub>3</sub> over the  $[\text{Ca}^{2+}]_T$  range of 3.2-20 mM. Then,  $P_{\text{Ca}_3}$  is 0, ~0.23, and ~0.61 for the three selected Ca<sup>2+</sup> concentration points. Using Equations S1 and S2, we calculate  $[\text{Ca}^{2+}]_F + [\text{C2}\alpha\cdot\text{Pb}\cdot\text{Ca}]$  to be 3.0, 7.7, and 19.6 mM. These numbers are within 7% of the corresponding  $[\text{Ca}^{2+}]_T$  values. This means that total Ca<sup>2+</sup> concentrations can be used instead of  $[\text{Ca}^{2+}]_F$  to construct the binding

curves for Step 2. Several binding curves with fits generated using Eq. (1) are shown in **Figure S3**.

The dissociation constant was found to be  $13 \pm 1$  mM. Fitting the curves using a  $P_0$  value that has been adjusted for the redistribution of Ca-only and Pb-containing species produced the same value of  $K_d$  within experimental error.

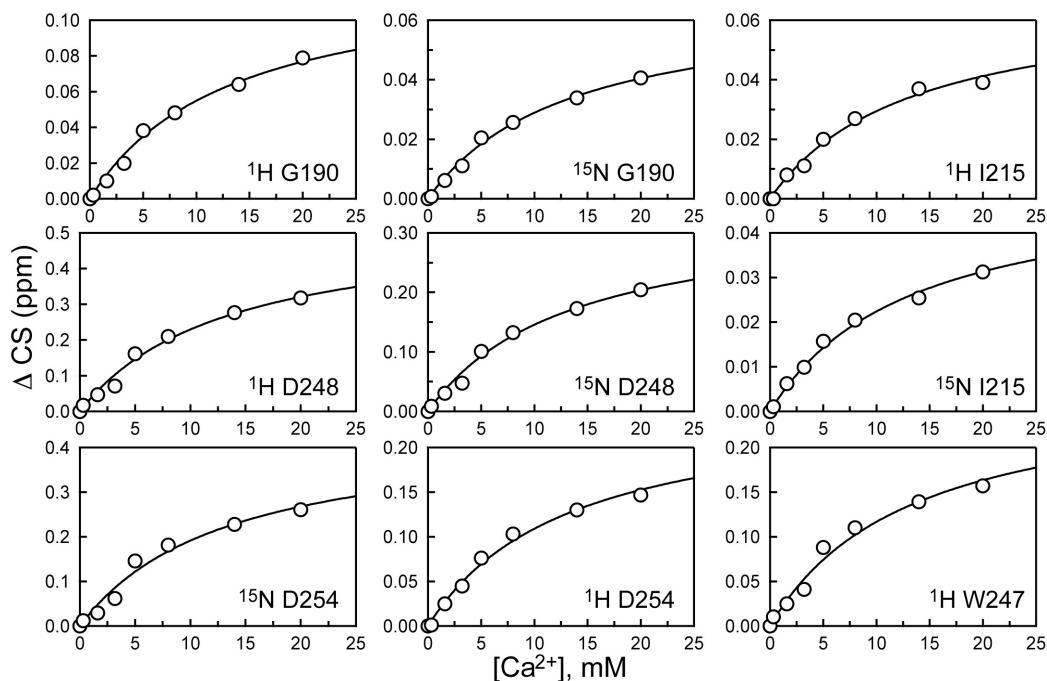

**Figure S3.**  $\text{Ca}^{2+}$  binding curves for residues of the preformed  $\text{C2}\alpha\text{:Pb}$  complex. The absolute change in chemical shift is plotted as a function of the total  $\text{Ca}^{2+}$  concentration. The fits were generated using Eq. (1) of the Experimental Section.

## 5. Cryoelectron microscopy of the LUV suspensions in the presence of divalent metal ions

To verify the integrity of the LUVs in the presence of  $\text{Pb}^{2+}$ , we collected cryoelectron microscopy (cryoEM) images of the vesicle suspensions. For comparison, we also acquired images of LUVs in the presence of  $\text{Ca}^{2+}$ . The total concentrations of metal ions and lipid were 1 mM and 1.5 mM, respectively. For metal ions, 1 mM is the maximum concentration that was used in our ultracentrifugation binding assays. The concentration of the PtdSer lipid component adjusted for the leaflet distribution was 248  $\mu\text{M}$ .

5  $\mu\text{l}$  of the LUV suspension pre-incubated with the respective metal ion was applied onto a carbon-coated copper grid. The grids were rendered hydrophilic by glow discharging. The grids were then

plunge-frozen in liquid ethane using an FEI Vitrobot. Samples were observed on a Tecnai G2 F20 FE-TEM instrument equipped with a GATAN Tridiem imaging filter. The acceleration voltage was 200 kV.

The cryoEM images are shown in **Figure S4**. Compared to  $\text{Ca}^{2+}$ , high concentrations of  $\text{Pb}^{2+}$  promote vesicle aggregation. However, the LUVs are intact and show a rather uniform size distribution. Based on these data, we concluded that  $\text{Pb}^{2+}$ -induced dissociation of C2 $\alpha$  from membranes is not due to the loss of structural integrity of LUVs.

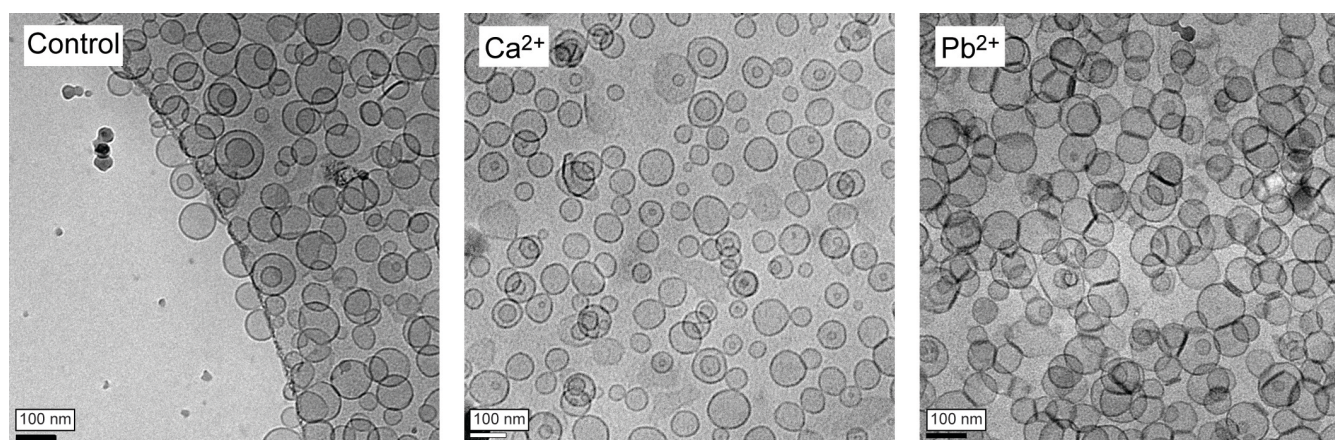

**Figure S4.** CryoEM images of LUVs (1.5 mM total lipid, POPS/POPC molar fractions of 33:67) in the absence of divalent metal ions (A) and in the presence of  $\text{Ca}^{2+}$  (B) and  $\text{Pb}^{2+}$  (C).

## 6. Association of $\text{Pb}^{2+}$ with PtdSer-containing membranes quantified by inductively coupled plasma (ICP) measurements

To determine if  $\text{Pb}^{2+}$  can associate with lipid membranes, we carried out an ultracentrifugation binding experiment as described in the Experimental Section, but without the protein. The concentrations of  $\text{Pb}^{2+}$  in the supernatant ( $[\text{Pb}^{2+}]_{\text{free}}$ ) and pellet ( $[\text{Pb}^{2+}]_{\text{bound}}$ ) fractions were determined using ICP measurements. In brief, samples were digested with Fisher Optima nitric acid, hydrogen peroxide, and hydrochloric acid and diluted to the desired volume with 18.2 M $\Omega$  MilliQ water. The measurements were carried on a Perkin Elmer DRC 2 inductively coupled plasma mass spectrometer. The samples were run in the "standard mode" using external calibration, with Bi-209 as the internal standard.



The total  $\text{Pb}^{2+}$  concentration varied from 0 to 1 mM, and the total lipid concentration was 1.5 mM. The total concentration of the PtdSer component, adjusted for the distribution between the inner and outer leaflets of the bilayer was 248  $\mu\text{M}$ . The fractional population of  $\text{Pb}^{2+}$ -bound PtdSer,  $\theta$ , was calculated as:  $\theta = [\text{PtdSer}]_{\text{bound}} / [\text{PtdSer}]_{\text{total}}$ . The data were fit using the following equation for single-site binding:

$$\theta = \frac{[\text{Pb}^{2+}]_{\text{free}}}{K_d + [\text{Pb}^{2+}]_{\text{free}}}$$

where  $K_d$  is the dissociation constant for the  $\text{Pb}^{2+}$ -PtdSer complex. The experimental data and the fit are shown in **Figure S5**. The  $K_d$  was determined to be  $119 \pm 12 \mu\text{M}$ .

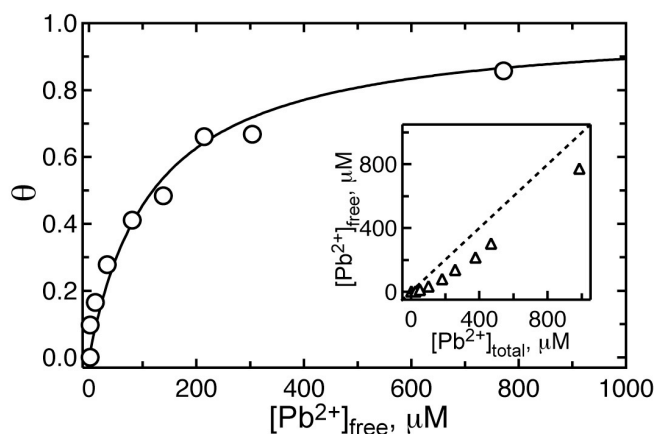

**Figure S5.**  $\text{Pb}^{2+}$  binding to 67% POPC:33% POPS LUVs quantified by ICP analysis.  $\theta$  is the fractional population of  $\text{Pb}^{2+}$ -bound PtdSer. The inset shows the relationship between the total and free  $\text{Pb}^{2+}$ .

## 7. Coordination preferences of protein-bound oxygen-coordinated $\text{Pb}^{2+}$

The 23 protein structures, in which  $\text{Pb}^{2+}$  has at least one oxygen ligand have the following PDB identifiers: 1AFV, 1E9N, 1FJR, 1HD7, 1HQJ, 1KA4, 1N0Y, 1NA0, 1QNV, 1QR7, 1SN8, 1SYY, 1XXA, 1ZHW, 1ZHY, 2ANI, 2CH7, 2EX3, 2FP1, 2G0A, 2O3C, 2V01, and 2XAL.

The structure of the zebra fish apurinic/apyrimidinic endonuclease (PDB ID 2O3C) was excluded from the analysis because of the partial occupancy of Pb sites. We further refined our criteria by requiring that (i) all ligands are oxygens and (ii)  $\text{Pb}^{2+}$  replaces a metal cofactor rather than being non-specifically adsorbed on the protein surface. The 14  $\text{Pb}^{2+}$  sites that met these criteria and their corresponding PDB identifiers are listed in **Table S2**. The distribution of Pb-O bond lengths for these 14 sites is shown in **Figure S6**.

**Table S2.** Pb<sup>2+</sup> sites selected for the Pb-O distance analysis.

| PDB ID          | Total number of Pb sites | Retained unique all-oxygen sites | Pb serial numbers      |
|-----------------|--------------------------|----------------------------------|------------------------|
| 1E9N            | 4                        | 2                                | 4339, 4342             |
| 1HD7            | 1                        | 1                                | 2072                   |
| 1N0Y            | 14                       | 4                                | 1315, 1317, 1328, 1330 |
| 2G0A            | 2                        | 1                                | 4655                   |
| 2XAL            | 4                        | 2                                | 6758, 6759             |
| 2V01            | 8                        | 4                                | 1117, 1118, 1119, 1120 |
| Total: 14 sites |                          |                                  |                        |

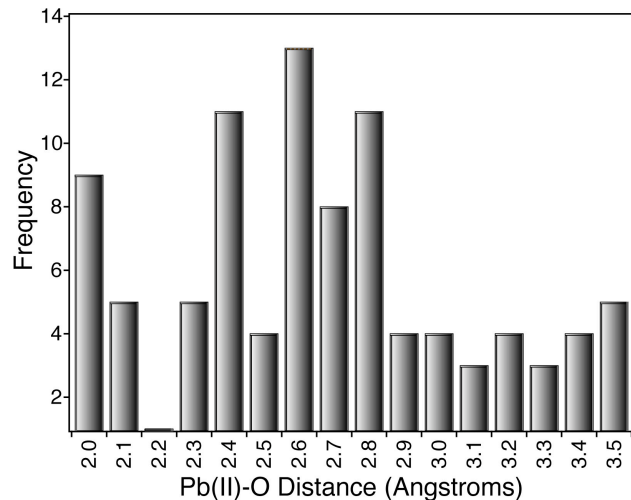

**Figure S6.** Histogram of the Pb-O distances measured for 14 all-oxygen Pb<sup>2+</sup> sites.

## REFERENCES

- (1) Marley, J.; Lu, M.; Bracken, C. *J. Biomol. NMR* **2001**, *20*, 71.
- (2) Otwinowski, Z.; Minor, W. *Macromolecular Crystallography, Pt. A* **1997**, 276, 307.
- (3) Verdaguer, N.; Corbalan-Garcia, S.; Ochoa, W. F.; Fita, I.; Gomez-Fernandez, J. C. *EMBO J.* **1999**, *18*, 6329.
- (4) Montaville, P.; Coudeville, N.; Radhakrishnan, A.; Leonov, A.; Zweckstetter, M.; Becker, S. *Protein Sci.* **2008**, *17*, 1025.
